# Supplementary material for: CD44 exerts a functional role during EMT induction in cisplatin-resistant head and neck cancer cells
Source: PubMed Central journal article supplement (PMC5839369; doi:10.18632/oncotarget.24252), 2018-01-13
Supplement: oncotarget-09-10029-s001.pdf [file oncotarget-09-10029-s001.pdf]

# CD44 exerts a functional role during EMT induction in cisplatin-resistant head and neck cancer cells

## SUPPLEMENTARY MATERIALS

**A**

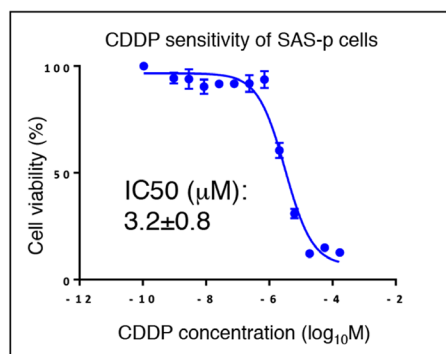

**B**

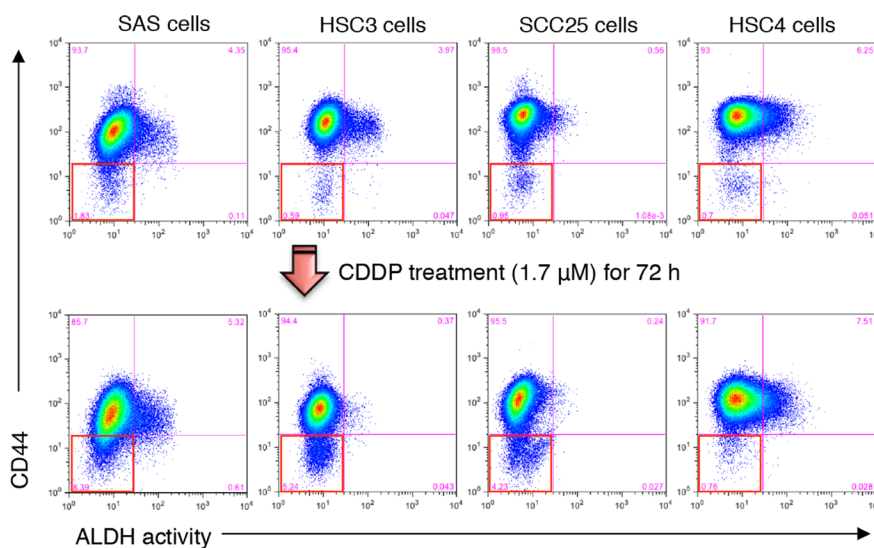

**Supplementary Figure 1: Flow cytometry analysis of CDDP-treated oral cancer cells. (A)** The IC50 values for CDDP when used to treat SAS cells. **(B)** Expression of CD44 and ALDH activity by CDDP-treated cells.

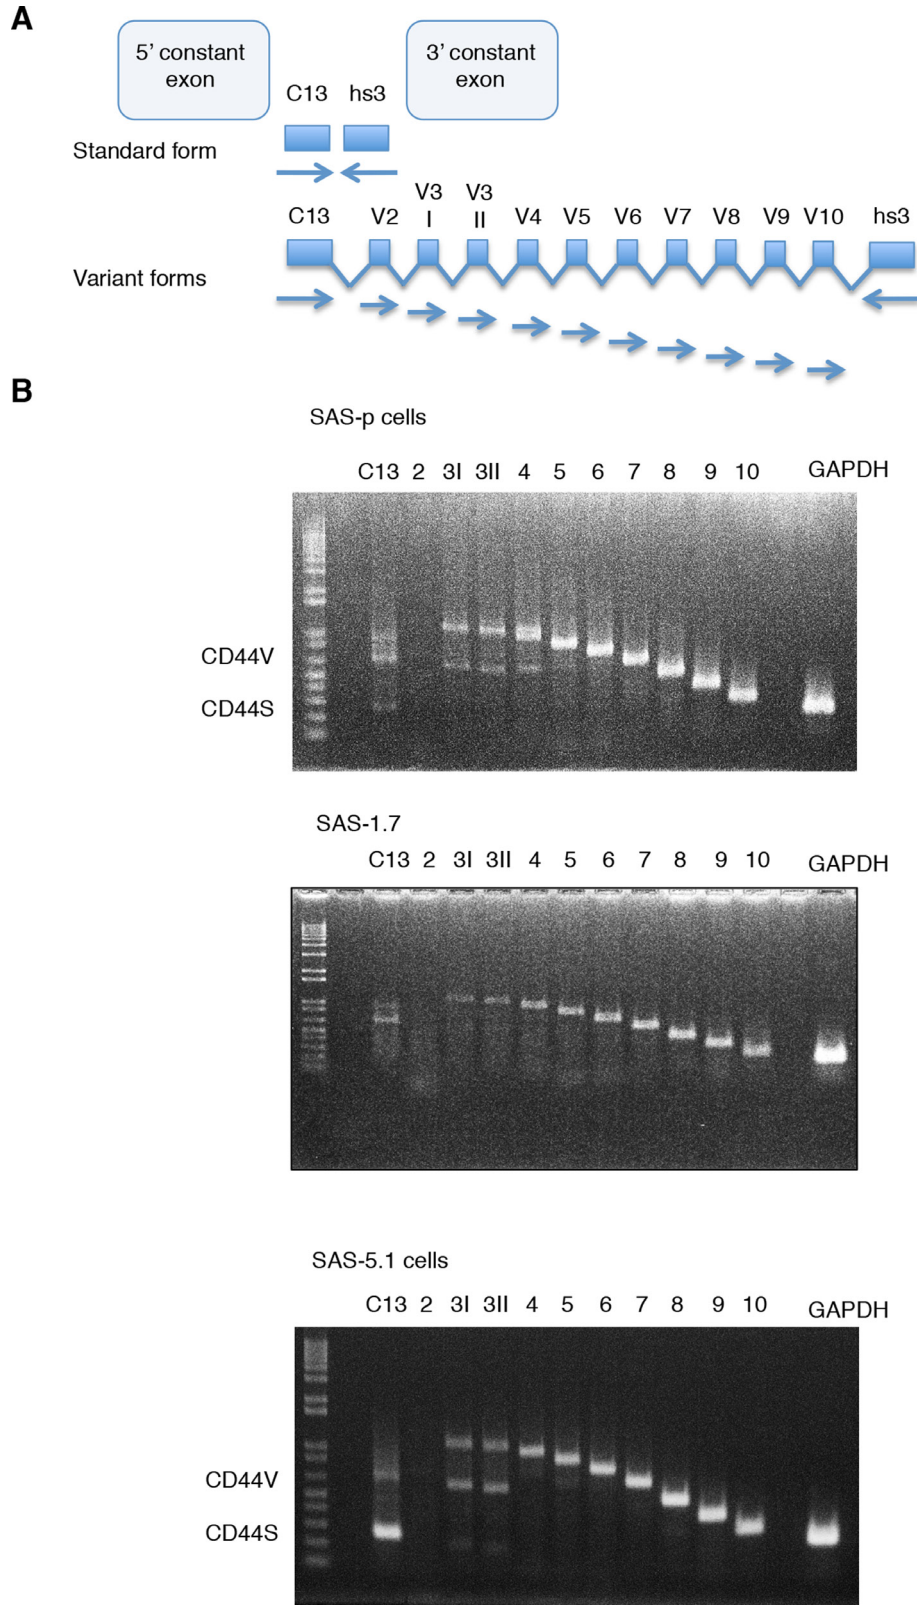

**Supplementary Figure 2: PCR analysis of CD44 isoforms expressed by SAS derivatives.** (A) A schematic illustration of the specific primers used to amplify CD44 isoforms. (B) Expression of CD44 isoforms by SAS derivatives.

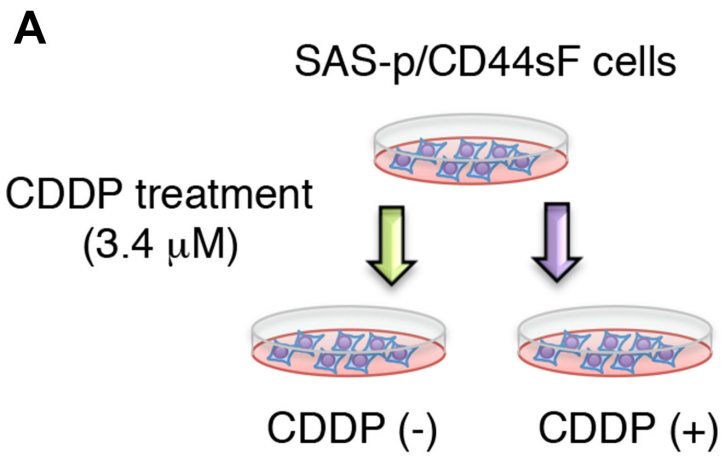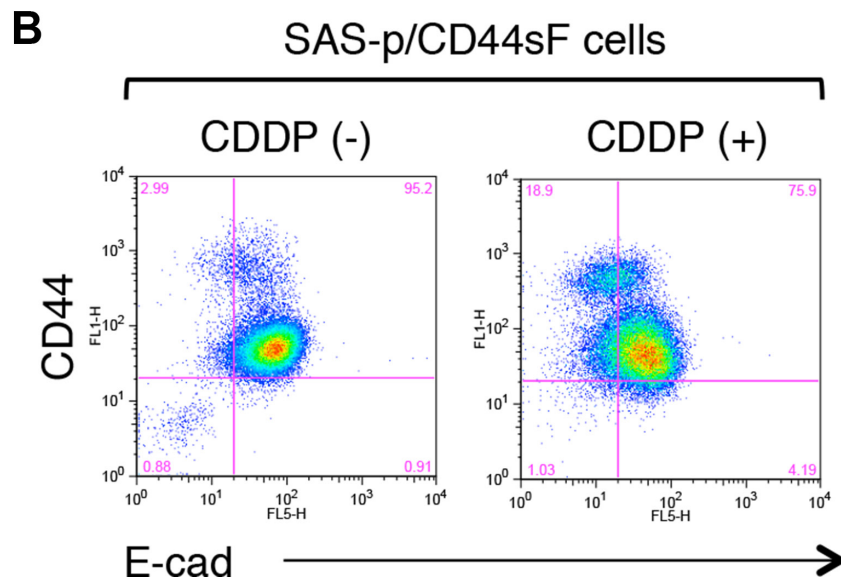

**Supplementary Figure 3: CDDP treatment induces cell surface localization of CD44s in SAS cells.** (A) Overview of the method used to establish CD44s-expressing SAS-p cells. (B) Localization of CD44s in SAS cells after exposure to 3.4  $\mu$ M CDDP.

**Supplementary Table 1: Primer sequence used for this study**

| <b>Primer name</b> | <b>Nucleotide sequence</b> |
|--------------------|----------------------------|
| hACTB Fw           | 5'-ggacttcgagcaagagatgg-3' |
| hACTB Rv           | 5'-agcactgtgtggcgtacag-3'  |
| hZEB1 Fw           | 5'-accagacagtgtaccagg-3'   |
| hZEB1 Rv           | 5'-acatcctgctcatctgcct-3'  |
| hSnail Fw          | 5'-gagagctgcaggactctaat-3' |
| hSnail Rv          | 5'-ggacagagtcccagatgagc-3' |
| hSlug Fw           | 5'-cttttcttgcctcactgc-3'   |
| hSlug Rv           | 5'-agcagccagattcctcatgt-3' |
| hTwist Fw          | 5'-ggagtccgagctttacgag-3'  |
| hTwist Rv          | 5'-ccagcttgagggtctgaatc-3' |
